# Supplementary material for: Rutin-Loaded Poloxamer 407-Based Hydrogels for In Situ Administration: Stability Profiles and Rheological Properties
Source: MDPI journal article supplement (doi:10.3390/nano10061069), 2020-05-31
Supplement: s1 [file s1]

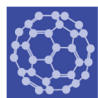

# Rutin-loaded poloxamer 407-based hydrogels for *in situ* administration: stability profiles and rheological properties

Elena Giuliano <sup>1</sup>, Donatella Paolino <sup>2</sup>, Maria Chiara Cristiano <sup>2</sup>, Massimo Fresta <sup>1</sup> and Donato Cosco <sup>1,\*</sup>

<sup>1</sup> Department of Health Sciences, University “Magna Græcia” of Catanzaro, Campus Universitario “S. Venuta”, Viale S. Venuta, I-88100 Catanzaro, Italy; giuliano.ele@gmail.com (E.G.); fresta@unicz.it (M.F.)

<sup>2</sup> Department of Experimental and Clinical Medicine, University “Magna Græcia” of Catanzaro, Campus Universitario “S. Venuta”, Viale S. Venuta, I-88100 Catanzaro, Italy; paolino@unicz.it (D.P.); mchiara.cristiano@unicz.it (M.C.)

\* Correspondence: donatocosco@unicz.it; Tel.: +39-0961-369-4119

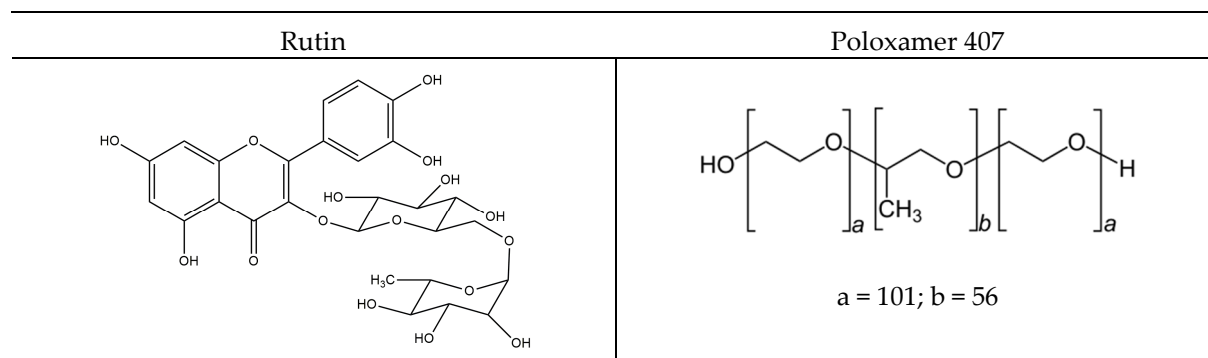

**Figure S1.** Chemical structure of rutin and poloxamer 407.

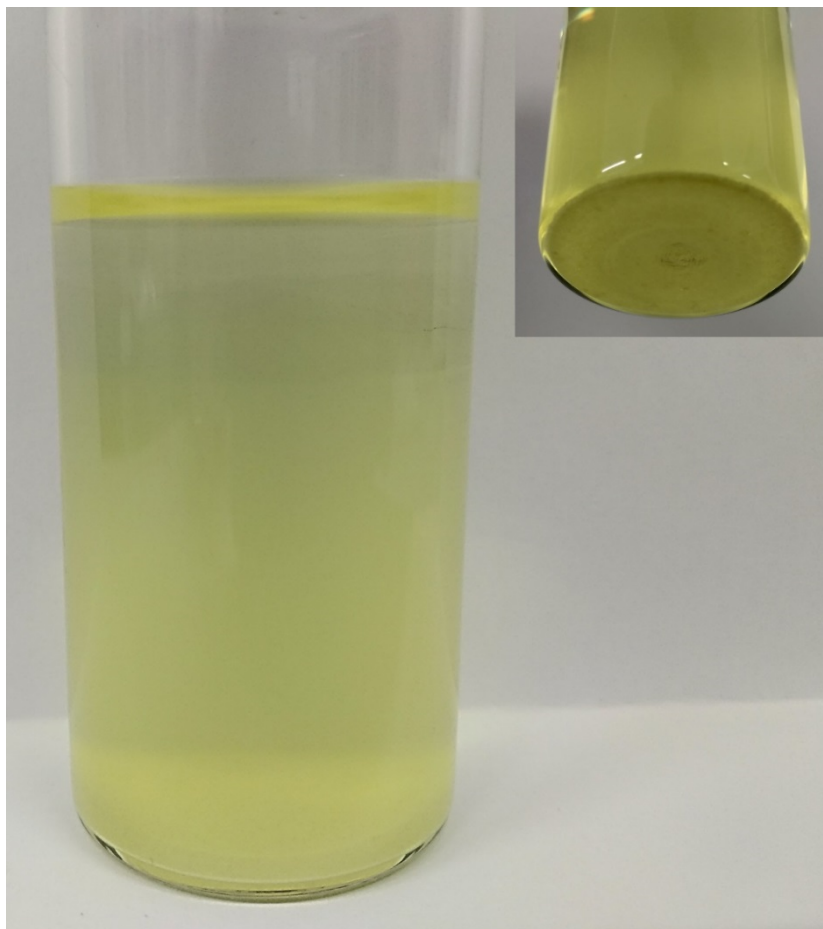

**Figure S2.** P407-based hydrogel prepared with 0.2% (w/w) of rutin

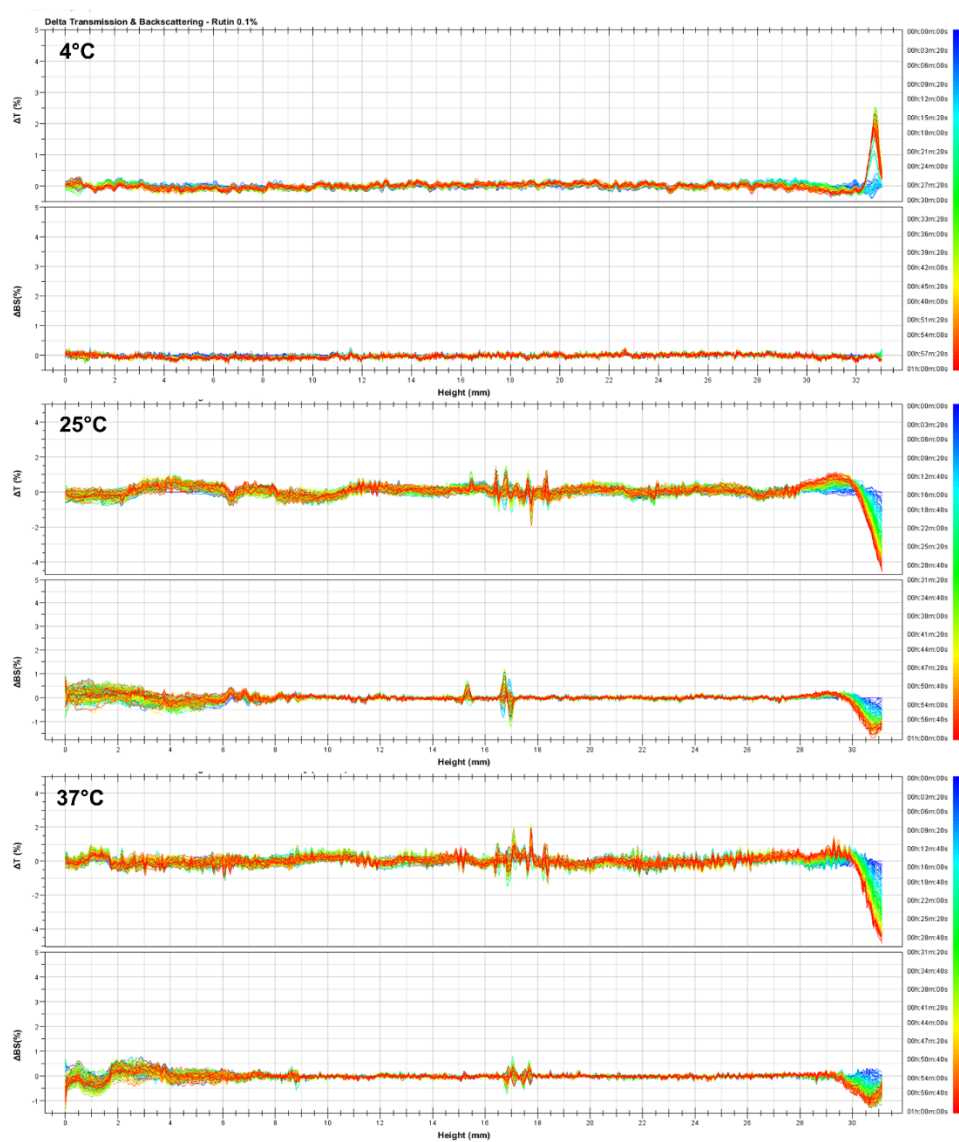

**Figure S3.**  $\Delta$ BS and  $\Delta$ T profiles of P407 hydrogels prepared with 0.1% (w/w) of rutin added in powder form as a function of the temperature and incubation time.

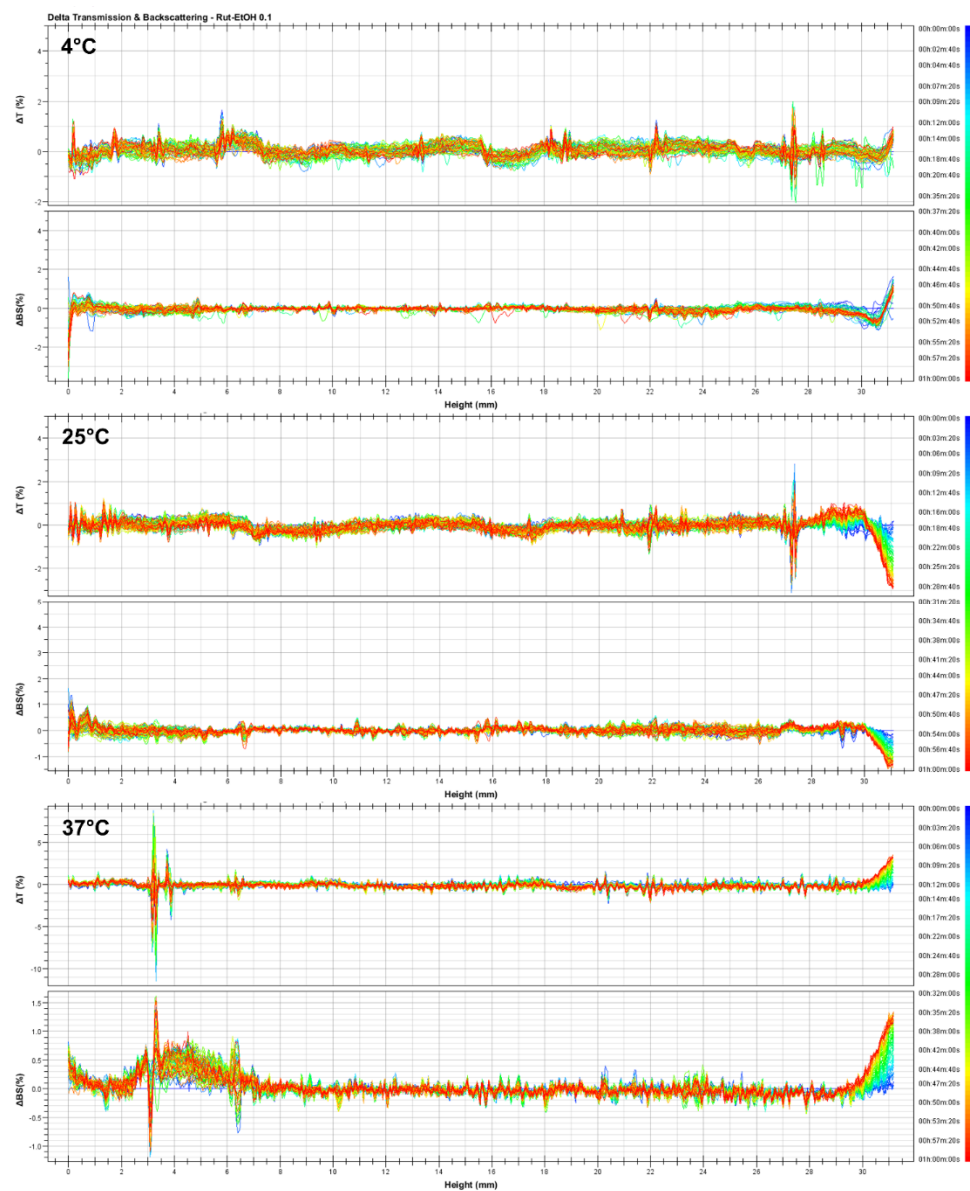

**Figure S4.**  $\Delta$ BS and  $\Delta$ T profiles of P407 hydrogels prepared with 0.1% (w/w) of rutin added as an ethanol solution as a function of the temperature and incubation time.

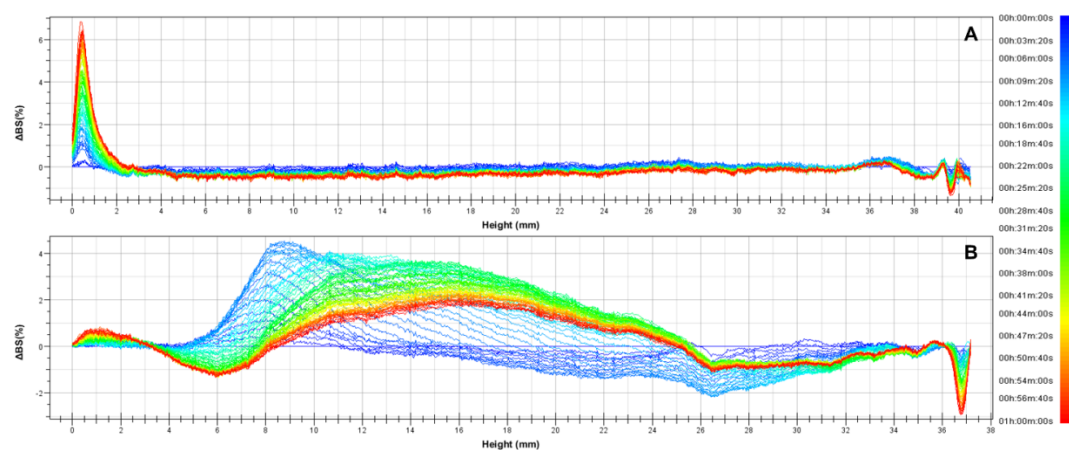

**Figure S5.**  $\Delta$ BS profiles of rutin-loaded P407 hydrogels at 4 °C prepared using (A) 0.2% (w/w) and (B) 0.5% (w/w) of the drug. During the analysis a progressive increase of the  $\Delta$ BS profiles occurred. This was due to the precipitation of the drug in the case of the formulation prepared with 0.2% of rutin and to the formation of macroaggregates in the system with 0.5% of the bioactive.

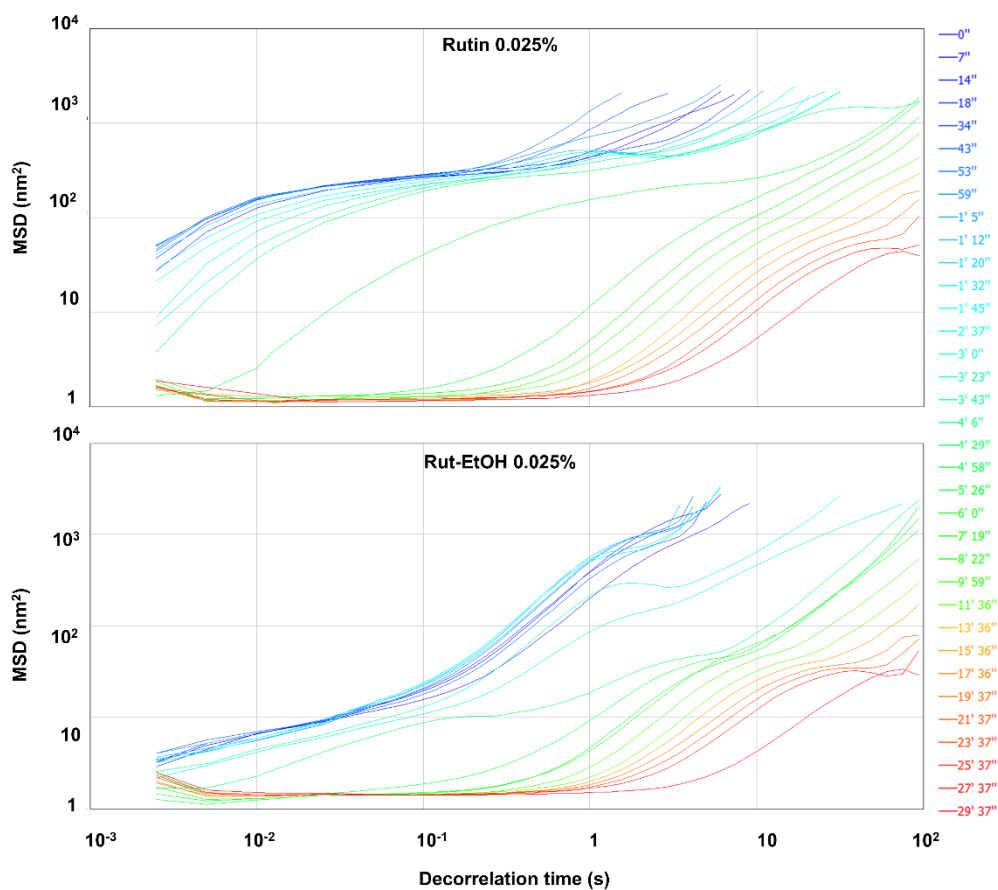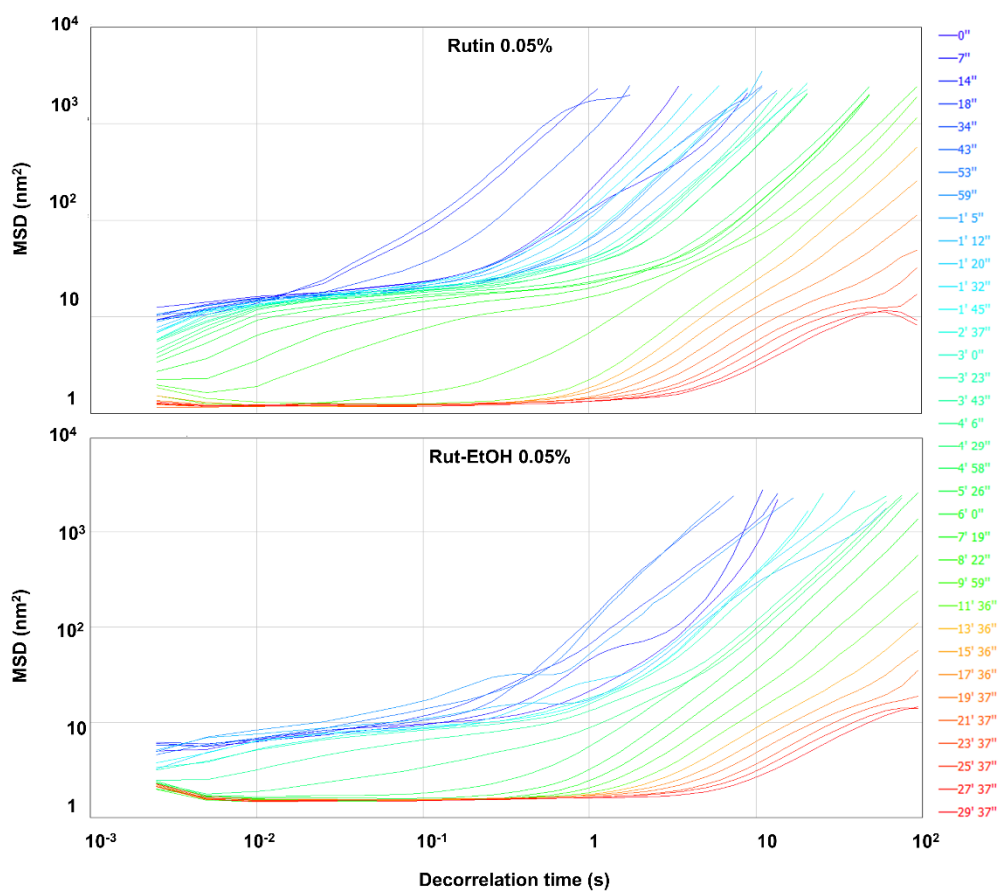

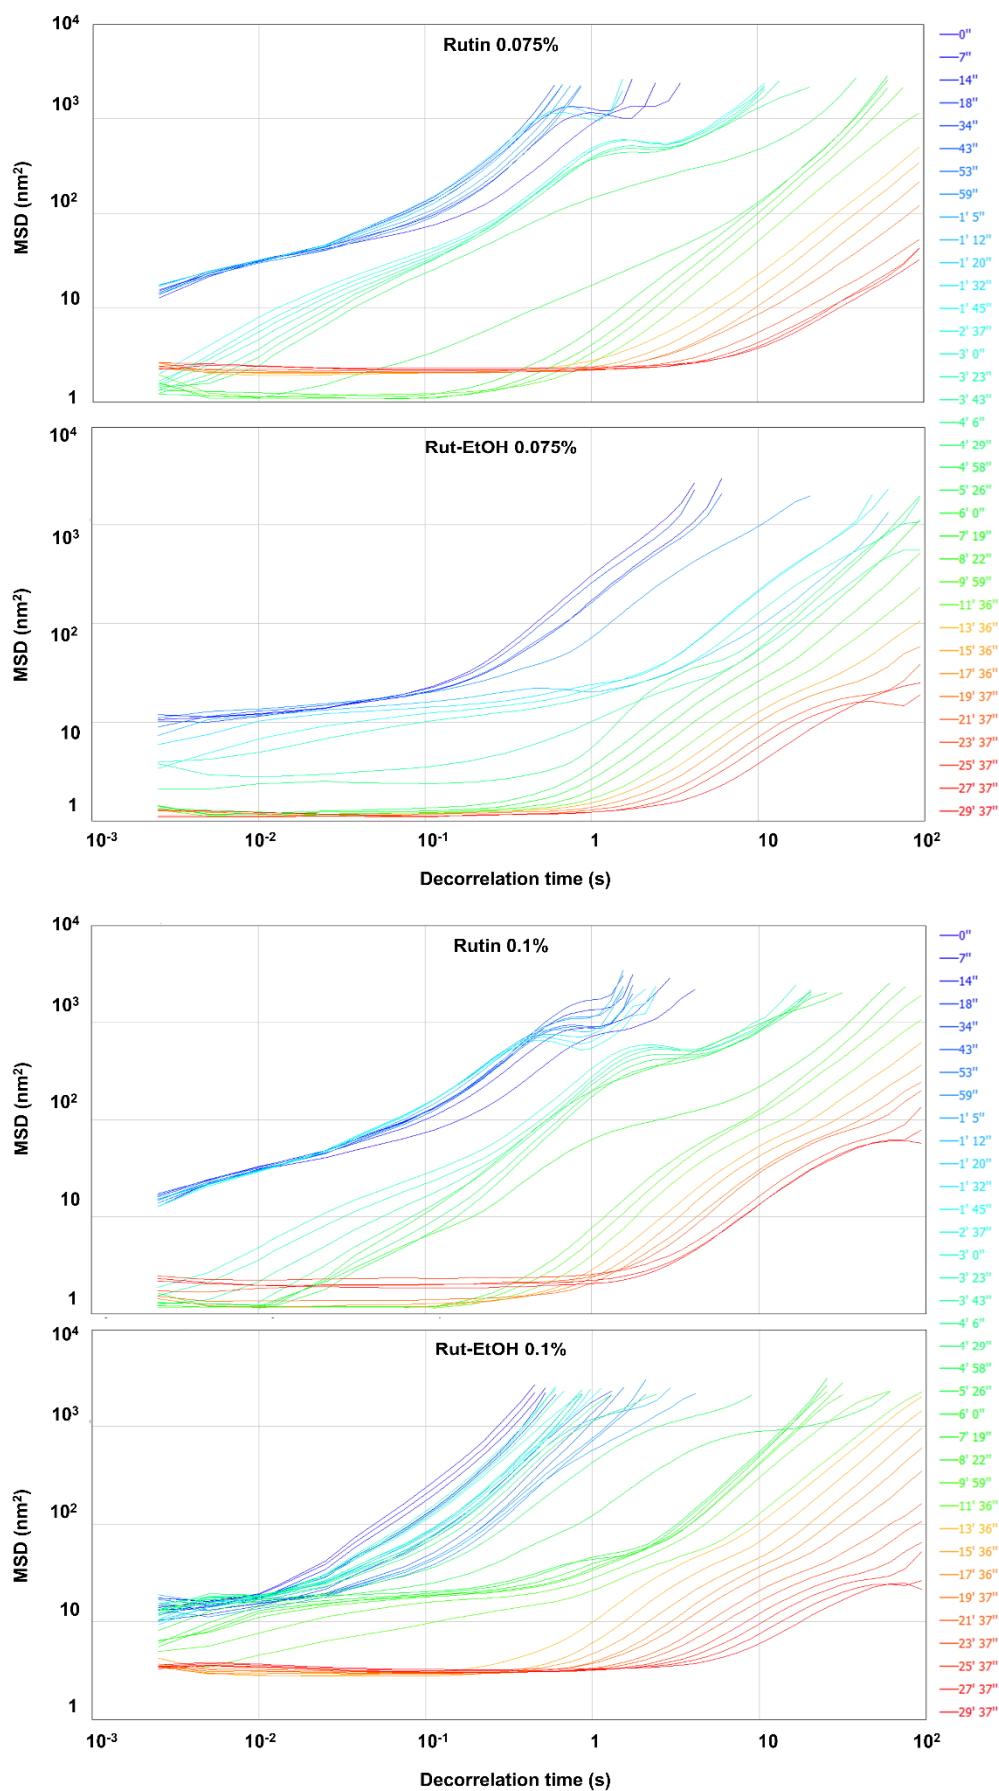

**Figure S6.** MSD curves of various P407 (20%, w/w)-based hydrogels containing different amounts of rutin as a powder or solubilized in ethanol as a function of the decorrelation time and temperature (from 4 °C to 37 °C).

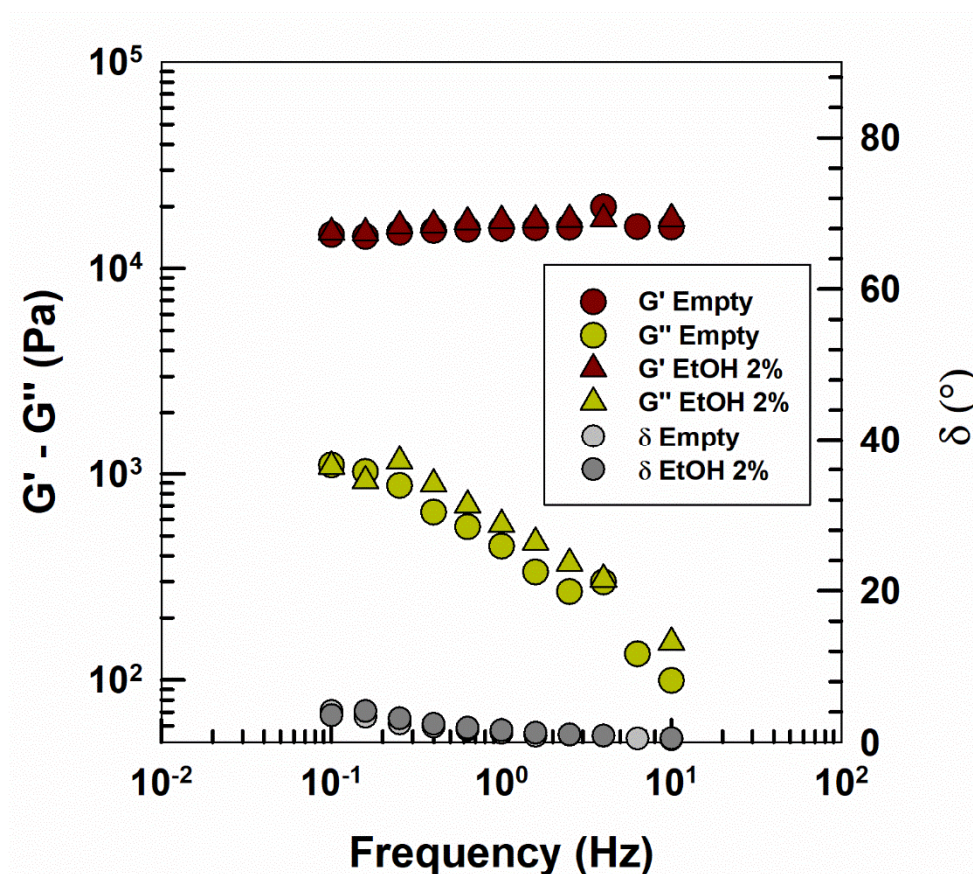

**Figure S7.** Elastic modulus ( $G'$ ), viscous modulus ( $G''$ ) and phase angle ( $\delta$ ) of P407 (20%, w/w) hydrogels as an ethanol-free system or containing the organic solvent (2%, w/w) as a function of frequency. This analysis was performed at 37 °C.



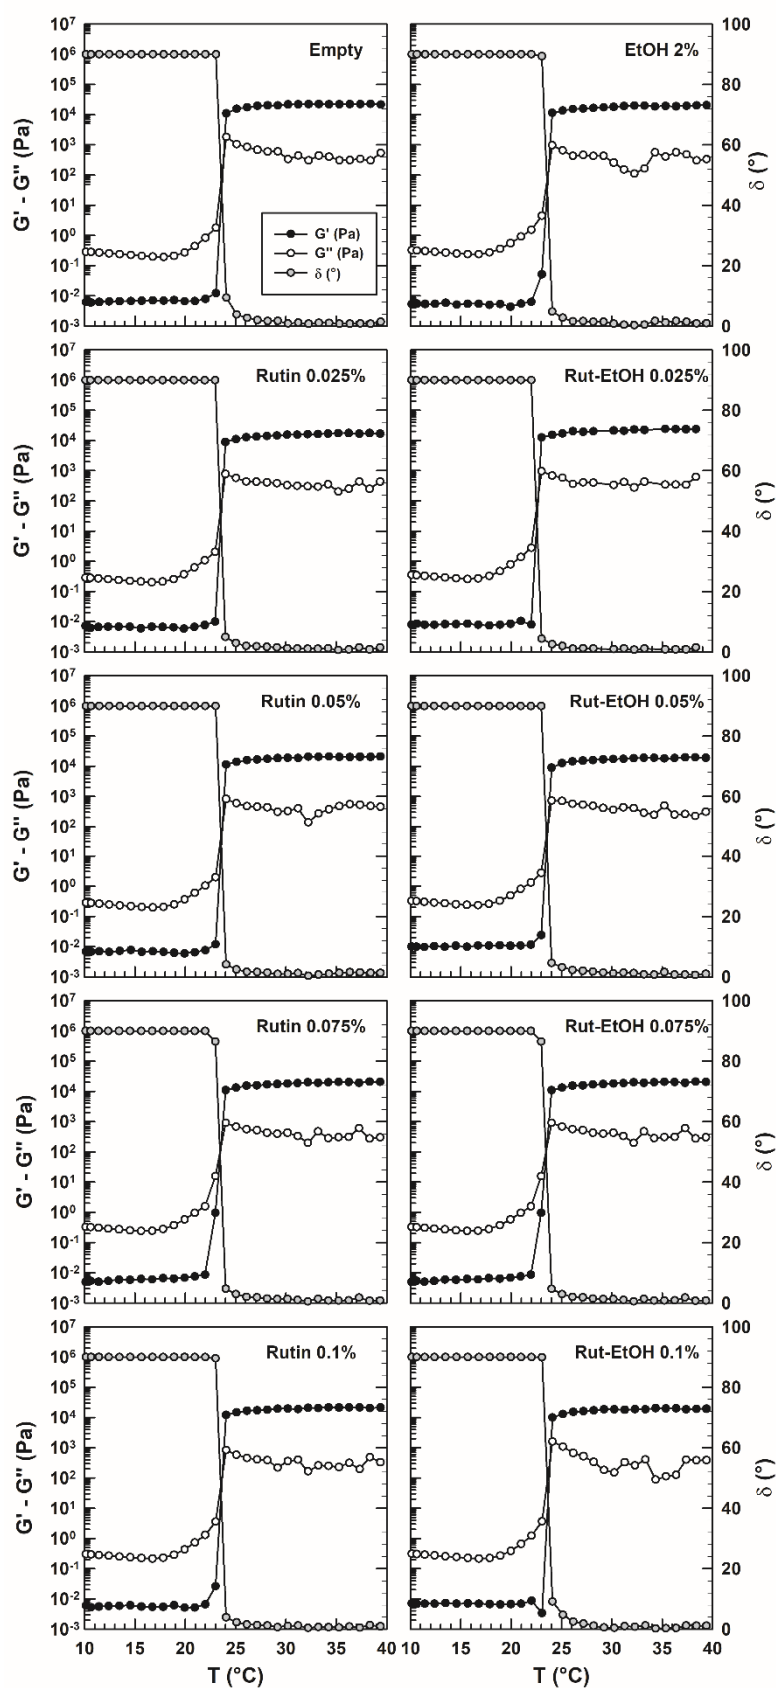

**Figure S8.** Elastic modulus ( $G'$ ), viscous modulus ( $G''$ ) and phase angle ( $\delta$ ) of the various P407-hydrogels as a function of temperature.

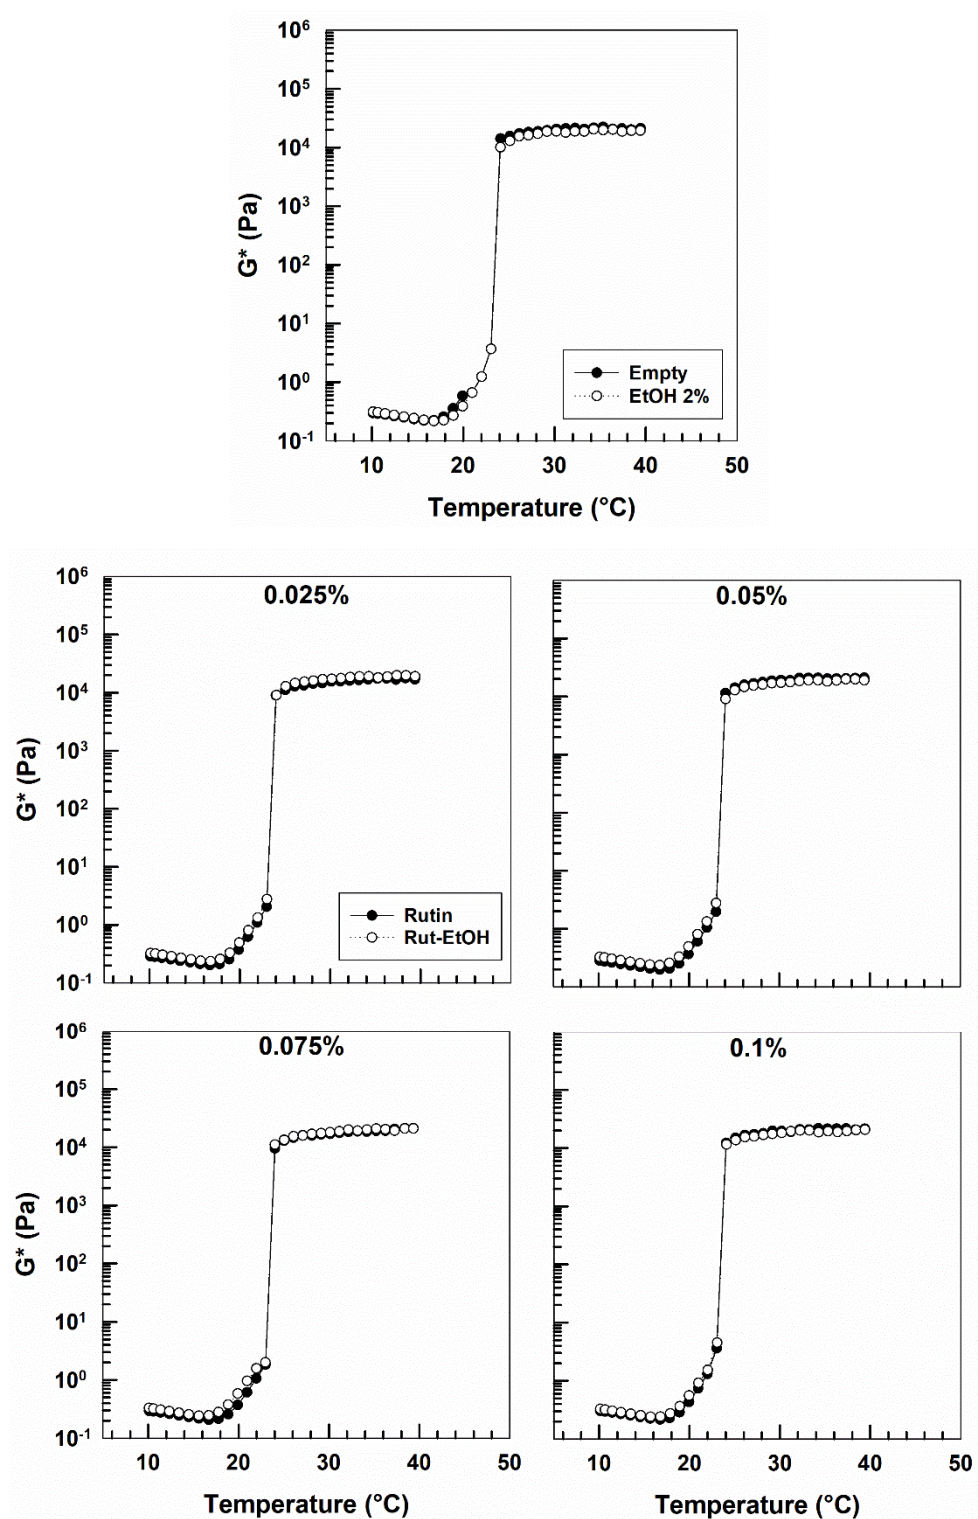

Figure S9. Complex modulus profiles of the various P407-hydrogels as a function of temperature.

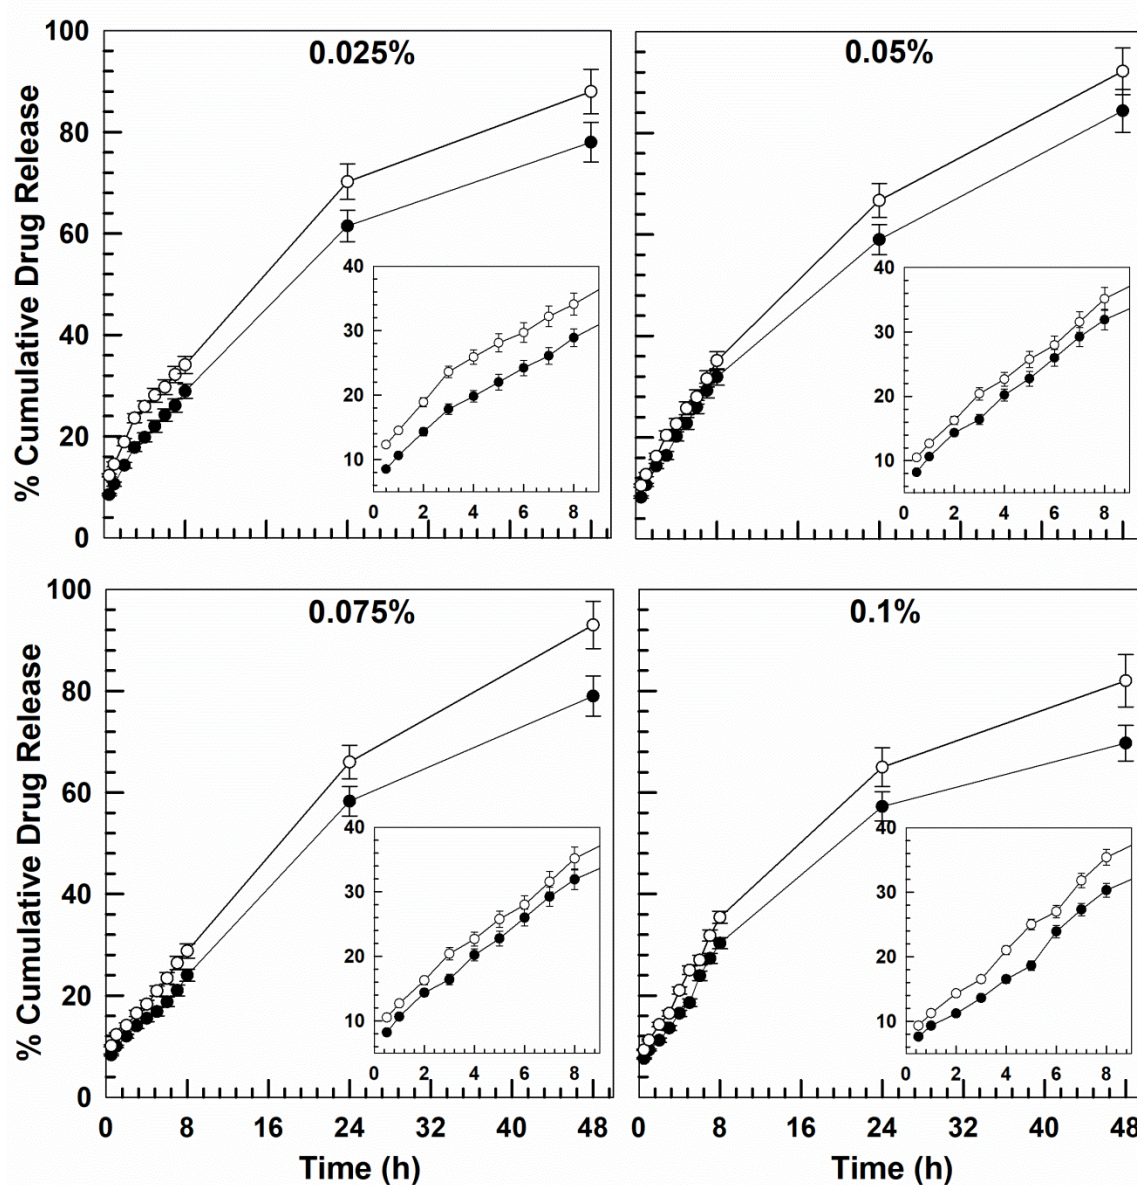

**Figure S10.** Release profiles of rutin in PBS from P407-based hydrogels. Experiments were carried out below the transition temperature. Values are the average of three different experiments  $\pm$  standard deviation.

**Table S1.** Values of SLB (solid-liquid balance) of the of the various P407-based hydrogels.

| Formulations    | SLB $t_i$ <sup>1</sup> | SLB $t_f$ <sup>1</sup> |
|-----------------|------------------------|------------------------|
| Empty           | 0.67                   | 0.04                   |
| EtOH 2%         | 0.89                   | 0.03                   |
| Rutin 0.025%    | 0.89                   | 0.02                   |
| Rutin 0.05%     | 0.89                   | 0.02                   |
| Rutin 0.075%    | 0.89                   | 0.02                   |
| Rutin 0.1%      | 0.69                   | 0.02                   |
| Rut-EtOH 0.025% | 0.86                   | 0.01                   |
| Rut-EtOH 0.05%  | 0.81                   | 0.01                   |
| Rut-EtOH 0.075% | 0.78                   | 0.01                   |
| Rut-EtOH 0.1%   | 0.80                   | 0.01                   |

<sup>1</sup>  $t_i$ : initial time of the analysis;  $t_f$ : final time of the analysis**Table S2.** Values of the phase angle ( $\delta$ ) of rutin-loaded P407 hydrogels as a function of frequency at 37 °C.

| Frequency (Hz) | Empty | EtOH 2% | Rutin 0.025% | Rutin 0.05% | Rutin 0.075% | Rut-EtOH 0.025% | Rut-EtOH 0.05% | Rut-EtOH 0.05% | Rut-EtOH 0.075% | Rut-EtOH 0.1% |
|----------------|-------|---------|--------------|-------------|--------------|-----------------|----------------|----------------|-----------------|---------------|
| 10.0           | 0.4   | 0.5     | 0.6          | 0.7         | 0.3          | 0.8             | 0.3            | 0.5            | 0.7             | 0.5           |
| 6.3            | 0.5   | 0.6     | 0.6          | 0.6         | 0.7          | 0.7             | 0.4            | 0.7            | 0.7             | 0.6           |
| 4.0            | 0.8   | 0.8     | 0.8          | 0.7         | 0.7          | 0.8             | 0.5            | 0.8            | 0.7             | 0.8           |
| 2.5            | 1.0   | 1.0     | 0.8          | 0.9         | 1.1          | 0.9             | 0.6            | 0.9            | 0.8             | 0.8           |
| 1.6            | 0.8   | 1.2     | 1.3          | 1.2         | 1.1          | 1.2             | 0.8            | 1.1            | 1.1             | 1.2           |
| 1.0            | 1.2   | 1.6     | 1.4          | 1.5         | 1.2          | 1.4             | 0.5            | 1.3            | 1.3             | 1.3           |
| 0.6            | 1.6   | 1.9     | 1.4          | 1.7         | 1.6          | 1.7             | 1.1            | 1.6            | 1.4             | 1.6           |
| 0.4            | 2.1   | 2.4     | 1.9          | 1.8         | 2.0          | 2.2             | 2.5            | 1.9            | 1.8             | 1.9           |
| 0.3            | 2.4   | 3.1     | 2.6          | 2.4         | 2.9          | 2.8             | 2.2            | 2.2            | 2.1             | 2.5           |
| 0.2            | 3.4   | 4.1     | 2.5          | 3.0         | 1.8          | 3.5             | 2.4            | 3.1            | 2.6             | 2.9           |
| 0.1            | 4.1   | 3.6     | 6.1          | 5.1         | 2            | 4.8             | 3.4            | 4.1            | 3.0             | 2.4           |

## Abbreviations

|               |                                           |
|---------------|-------------------------------------------|
| P407          | Poloxamer 407                             |
| EtOH          | Ethanol                                   |
| $T_{sol-gel}$ | Solution-gel transition temperature       |
| MLS           | Multiple Light Scattering                 |
| $\Delta BS$   | Delta Back-scattering                     |
| $\Delta T$    | Delta Transmission                        |
| TSI           | Turbiscan stability index                 |
| MS-DWS        | Multi-speckle diffusing wave spectroscopy |
| MSD           | Mean square displacement                  |
| SLB           | Solid-liquid balance                      |
| EI            | Elasticity index                          |
| LVR           | Linear viscoelastic region                |
| MW            | Molecular weight                          |
